# Supplementary material for: Phospholipase D1 Ameliorates Apoptosis in Chronic Renal Toxicity Caused by Low-Dose Cadmium Exposure
Source: PubMed Central journal article supplement (PMC7150706; doi:10.1155/2020/7091053), 2020-03-31
Supplement: 7091053.f1.pdf [file 7091053.f1.pdf]

## Supplementary Material

### Supplementary Tables

**Suppl. Table 1** Primers used for qRT-PCR in this study

| Gene names     | Primers                         | Species           |
|----------------|---------------------------------|-------------------|
| PLD1           | F: ACAGCATTAGCAGCGTCG           | Rattus norvegicus |
|                | R: CCAGTTGAACCCAGTCCTT          |                   |
| PLD1           | F: CTTATCCTTTTCTGCTTCCA         | Homo sapiens      |
|                | R: AGTGCCTGCTGTTCTCTATC         |                   |
| $\beta$ -actin | F: CCCATCTATGAGGGTTACGC         | Rattus norvegicus |
|                | R: TTTAATGTCACGCACGATTTC        |                   |
| $\beta$ -actin | F: GGGAAATCGTGCGTGACATTAAGG     | Homo sapiens      |
|                | R: CAGGAAGGAAGGCTGGAAGAGTG      |                   |
| miR-122-5p     | F:AGTGGAGTGTGACAATGGT           | Rattus norvegicus |
|                | R:CCAGTTTTTTTTTTTTTTTTTCAAACACC |                   |
| miR-122-5p     | F: AGTGGAGTGTGACAATGGT          | Homo sapiens      |
|                | R:CCAGTTTTTTTTTTTTTTTTTCAAACACC |                   |
| U6             | F: CTCGCTTCGGCAGCACA            | Rattus norvegicus |
|                | R: AACGCTTCACGAATTTGCGT         |                   |
| U6             | F: CTCGCTTCGGCAGCACA            | Homo sapiens      |
|                | R: AACGCTTCACGAATTTGCGT         |                   |

F: forward primer, R: reverse primer

**Suppl. Table 2** Serum and urine creatinine level, and creatinine clearance of SD rats

chronically exposed to a low level of Cd

| Groups       | SCr (mg/dL) | UCr (mg/dL)  | CrCl (dL/min) | <i>p</i> <sup>*</sup> |
|--------------|-------------|--------------|---------------|-----------------------|
| Control      | 0.37±0.1    | 212.49±42.81 | 11.17±3.57    | 0.253                 |
| Cd treatment | 0.32±0.05   | 232.58±47.21 | 13.82±3.90    |                       |

SCr, serum creatinine; UCr, urine creatinine; CrCl, creatinine clearance. N = 3, \**t*-test for CrCl difference.

## Supplementary Figures

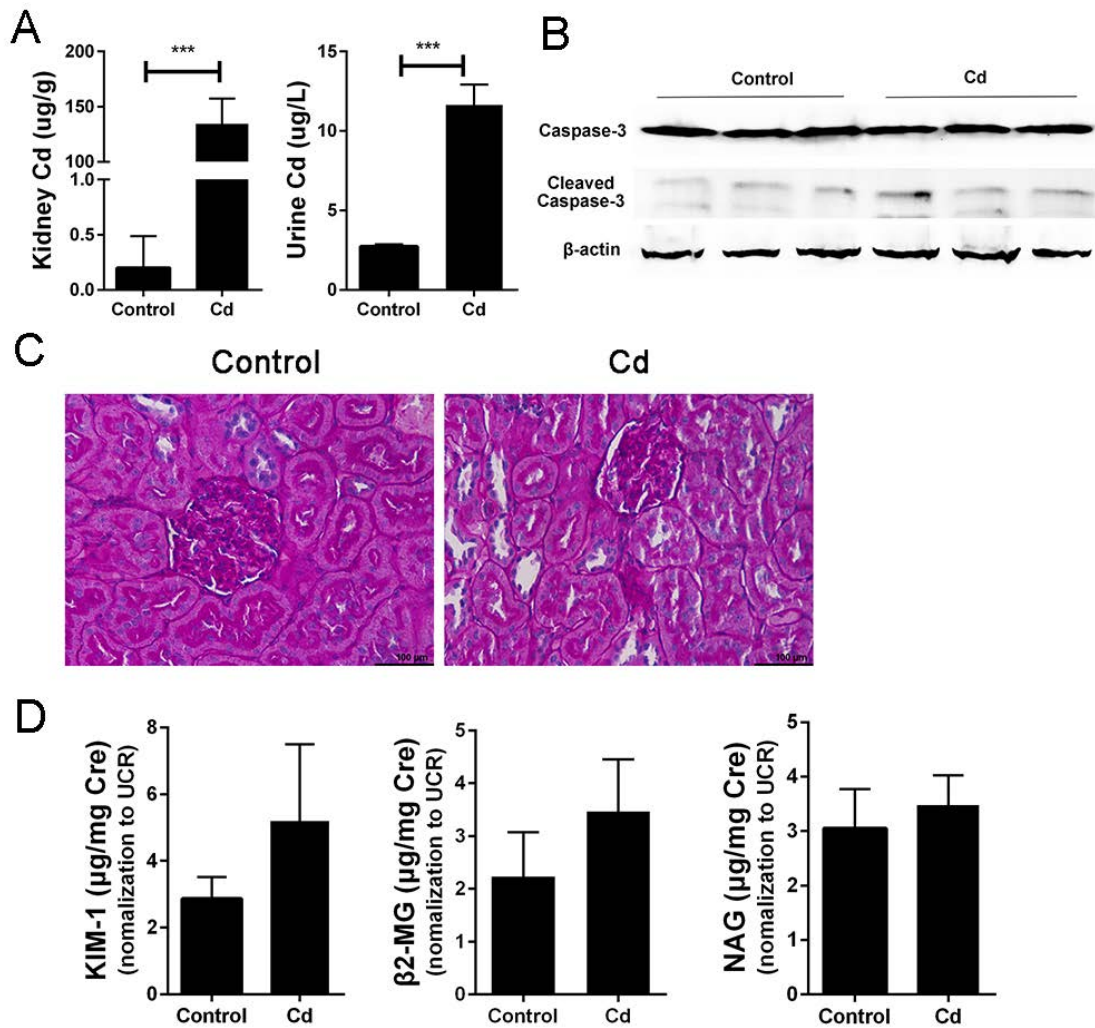

**Suppl. Fig. 1 Measurements of kidney impairment in rats exposed to chronic Cd for 6 weeks.** (A) The concentration of Cd, detected using ICP-MS, in kidney tissue and urine of rats. (B) Pathohistological stain in kidney tissue produced by Cd exposure (Periodic Acid-Schiff stain, HE $\times$ 400). (C) Cleaved-Caspase-3 expression after Cd exposure. (D) Early biomarkers of kidney injury in urine detected with ELISA. Rats exposed to CdCl<sub>2</sub> at 0.6 mg/kg/d for 5 days per week for 6 weeks. Data are represented as mean  $\pm$  SD, N = 3, \* $p$  < 0.05, \*\*\* $p$  < 0.001.

**A**

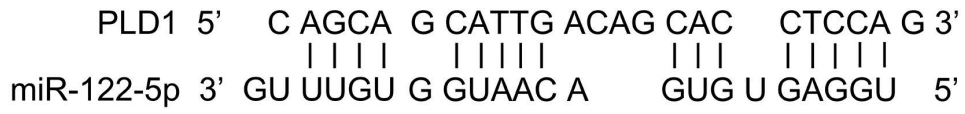

**B**

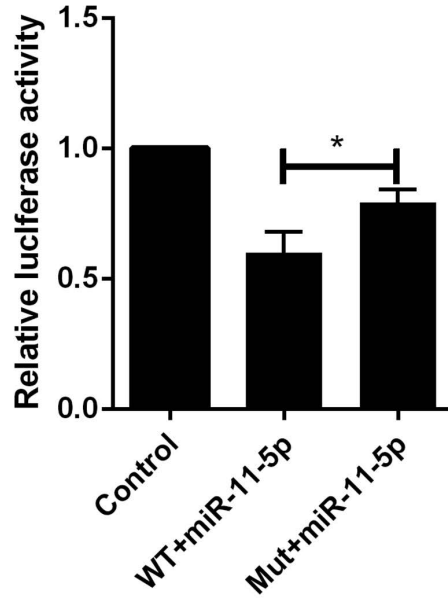

**Suppl. Fig. 2. miR-122-5p binding site in *PLD1*.** (A) Schematic diagram of the miR-122-5p putative binding site in *PLD1*. (B) Validation of miR-122-5p binding site in *PLD1* using dual-luciferase reporter assay.

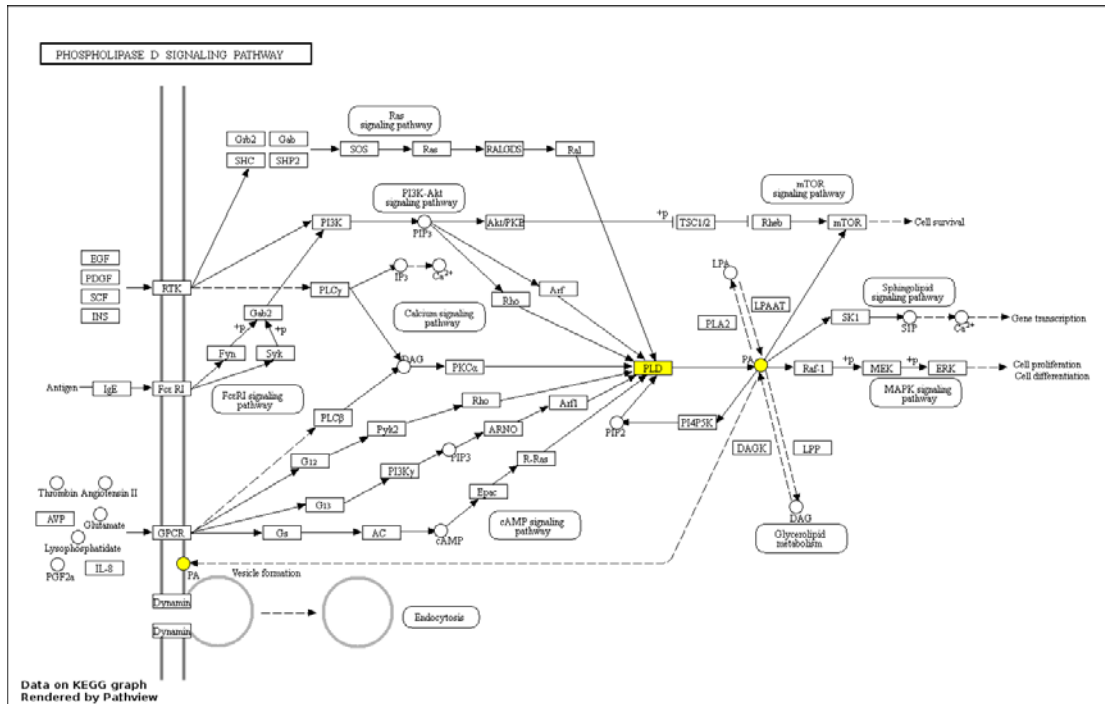

**Suppl. Fig. 3 Phospholipase D signaling pathway constructed by Pathview based on KEGG.**
